# Supplementary material for: Systematic study of ionic conduction in silver iodide/mesoporous alumina composites 1: effects of pore size and filling level
Source: Royal Society of Chemistry journal article supplement (doi:10.1039/d3cp03546h), 2023-01-01
Supplement: d3cp03546h1.pdf [file d3cp03546h1.pdf]

*Electronic Supplementary Information (ESI)*

**Systematic study of ionic conduction in silver iodide /  
mesoporous alumina composites 1: Effect of pore size  
and filling level**

*Yoko Fukui,<sup>\*a</sup> Yukihiro Yoshida,<sup>\*b</sup> Hiroshi Kitagawa<sup>b</sup> and Yohei Jikihara<sup>a</sup>*

<sup>a</sup> NBC Meshtec Inc., 2-50-3 Toyoda, Hino, Tokyo 191-0053, Japan

<sup>b</sup> Division of Chemistry, Graduate School of Science, Kyoto University, Kitashirakawa  
Oiwake-cho, Sakyo-ku, Kyoto 606-8502, Japan

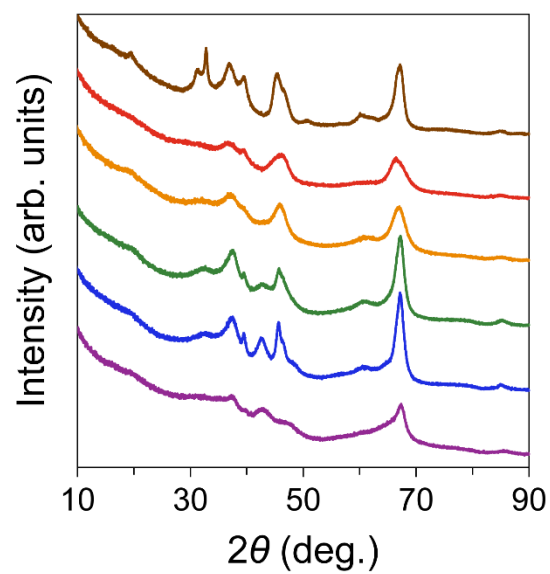

**Fig. S1** PXRD pattern of MPAs (brown: MPA1, red: MPA2, orange: MPA3, green: MPA4, blue: MPA5, purple: MPA6) after heat treatment.

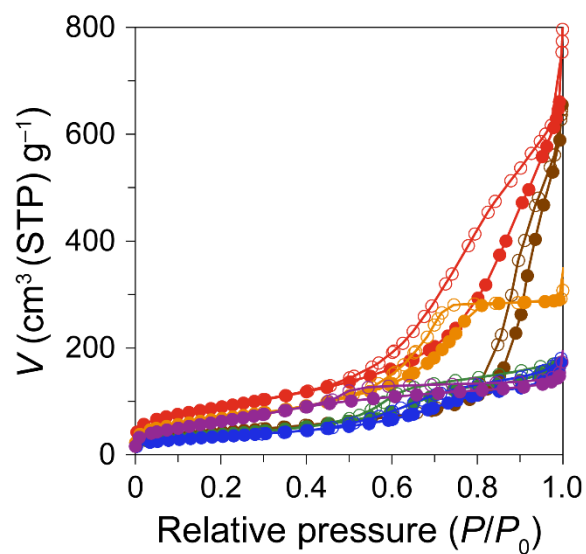

**Fig. S2** N<sub>2</sub> gas adsorption (closed symbols) and desorption (open symbols) isotherms at 77 K (brown: MPA1, red: MPA2, orange: MPA3, green: MPA4, blue: MPA5, purple: MPA6).

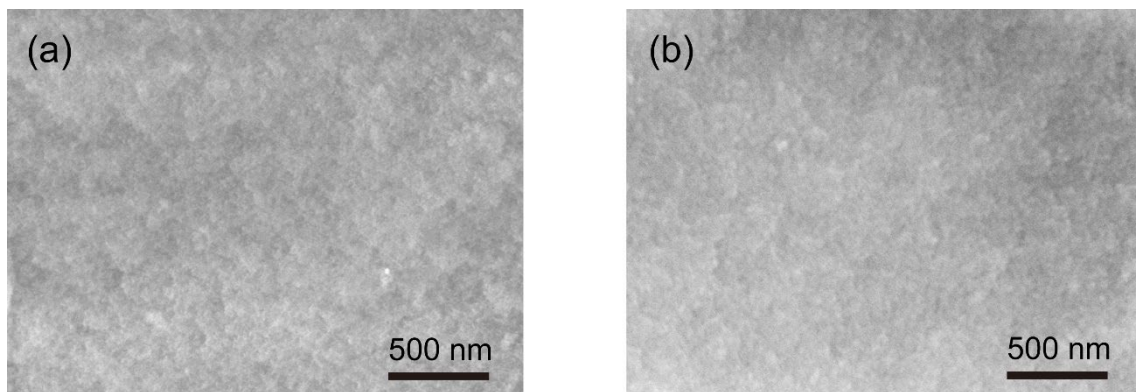

**Fig. S3** SEM images of AgI/MPA3 composites (a) before and (b) after heat treatment at 600 °C for 20 h.

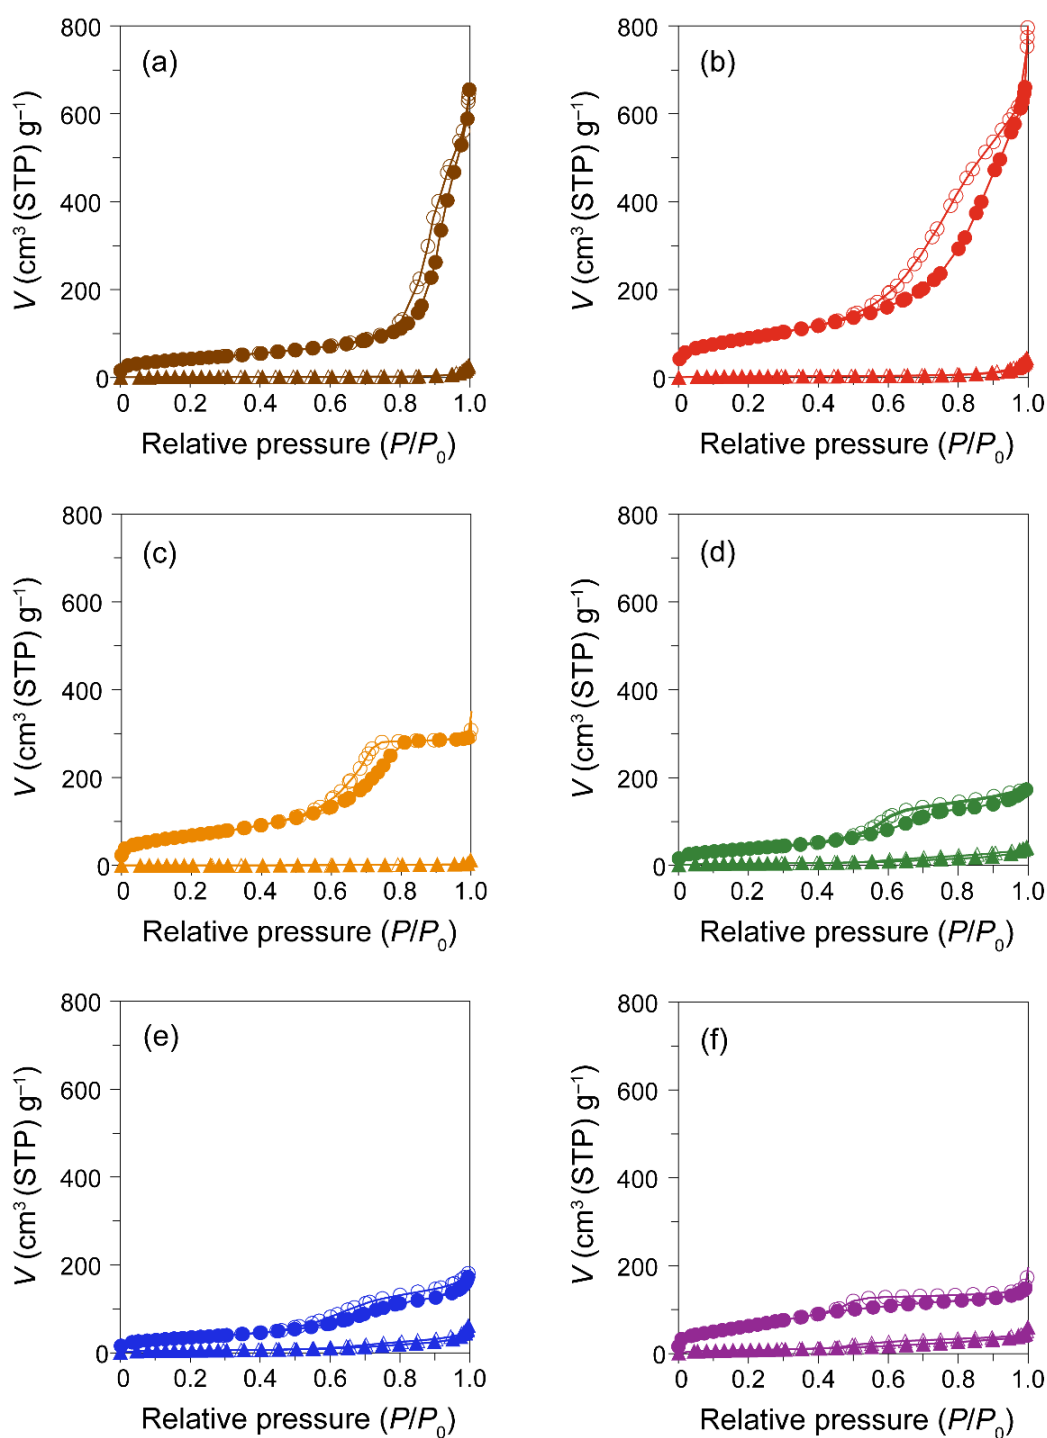

**Fig. S4**  $\text{N}_2$  gas adsorption (closed symbols) and desorption (open symbols) isotherms of parent MPAs (circles) and the AgI-loaded composites with the volumetric filling factor of approximately 90% (triangles) for (a) MPA1, (b) MPA2, (c) MPA3, (d) MPA4, (e) MPA5, and (f) MPA6 at 77 K.

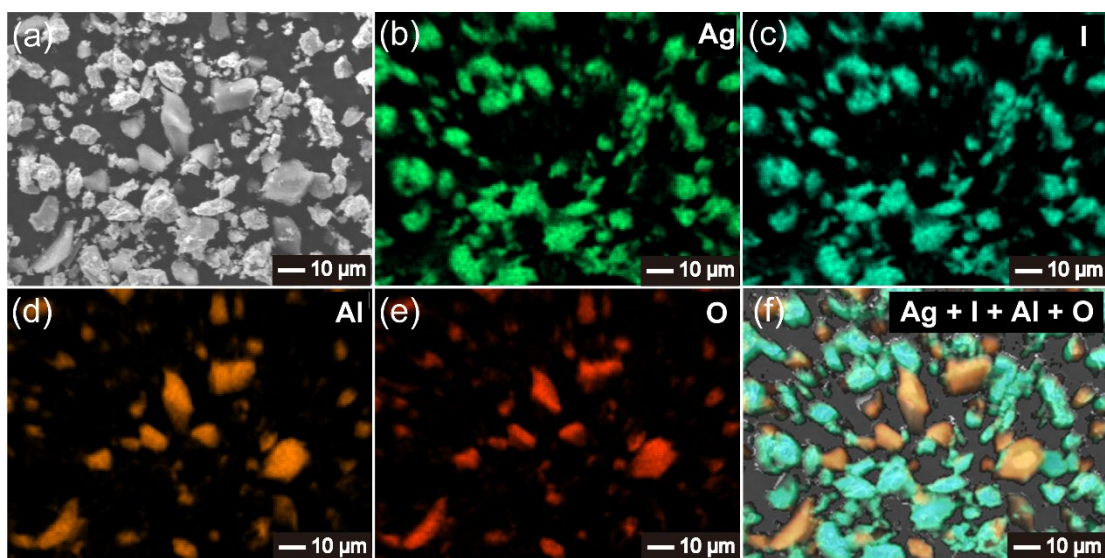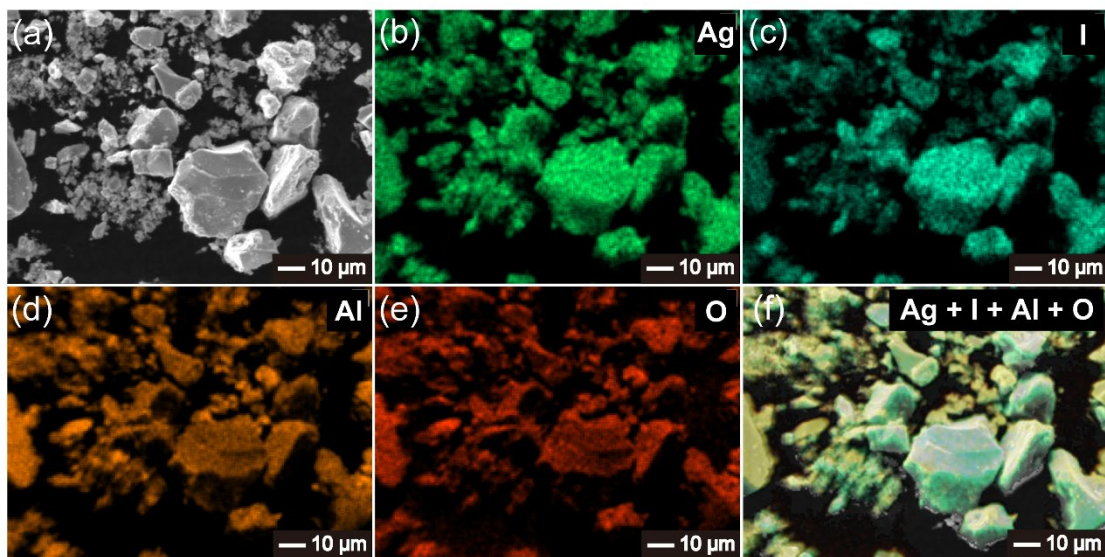

**Fig. S5** (a) SEM image and EDS mappings ((b) silver, (c) iodine, (d) aluminum, (e) oxygen, and (f) superposition of four elements) of AgI/MPA3 composites (top) before and (bottom) after heat treatment.

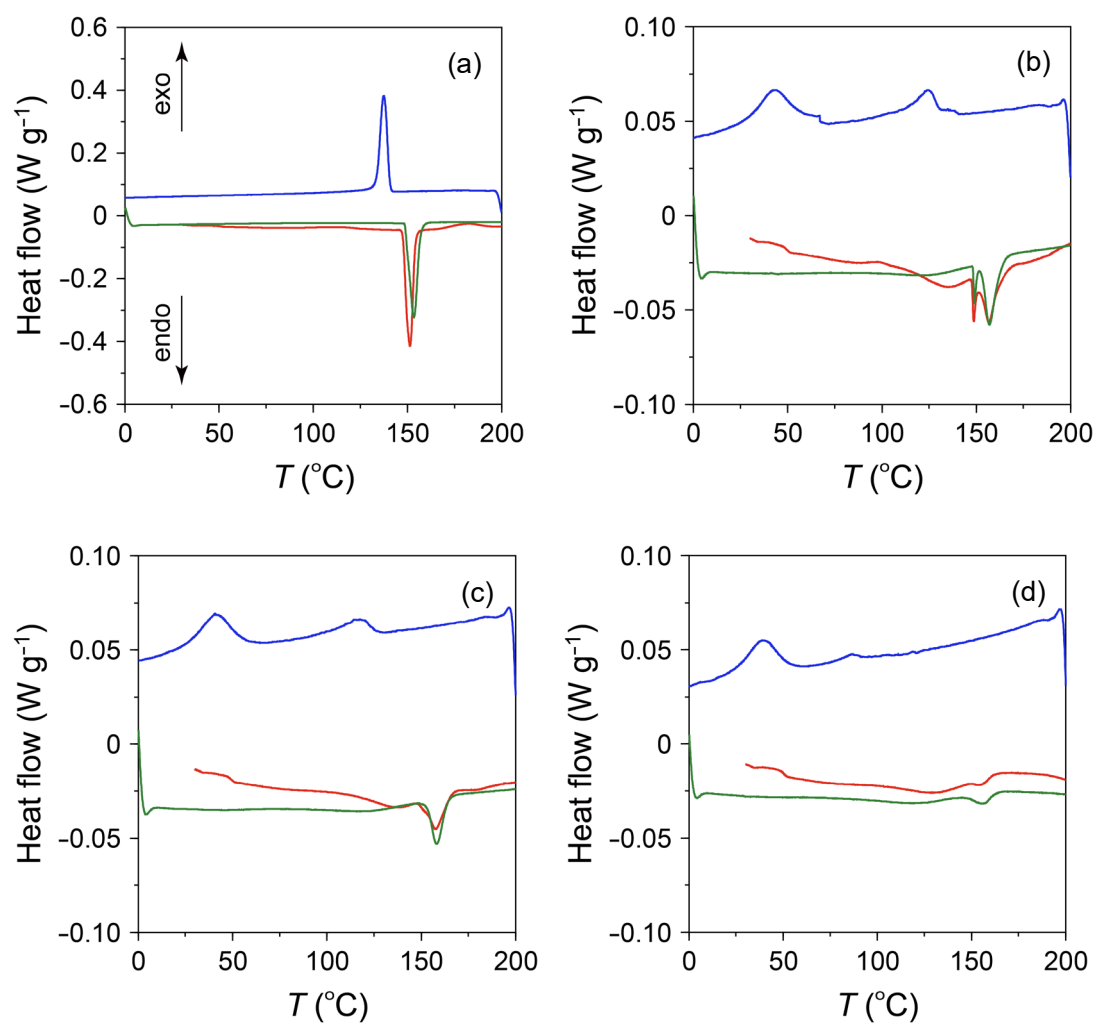

**Fig. S6** DSC profiles of AgI/MPA3 composites before heat treatment (a) and after heat treatment at (b) 400  $^{\circ}\text{C}$ , (c) 500  $^{\circ}\text{C}$ , and (d) 600  $^{\circ}\text{C}$  (red: 1st heating process, blue: 1st cooling process, green: 2nd heating process).

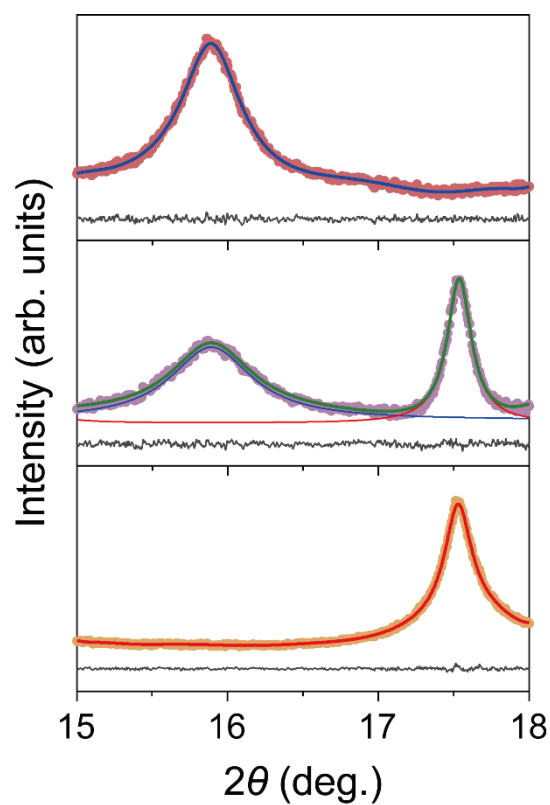

**Fig. S7** Synchrotron PXRD patterns of AgI/MPA3 composite at 25, 160, and 190 °C from the bottom in the heating process ( $\lambda = 0.699585(1) \text{ \AA}$ ). Experimental profiles (orange, purple, and red circles) were refined by the Rietveld method, where red, blue, and green lines indicate the calculated patterns for  $\beta$ -phase,  $\alpha$ -phase, and the sum of the components, respectively. Gray lines indicate the difference between observed and calculated profiles.



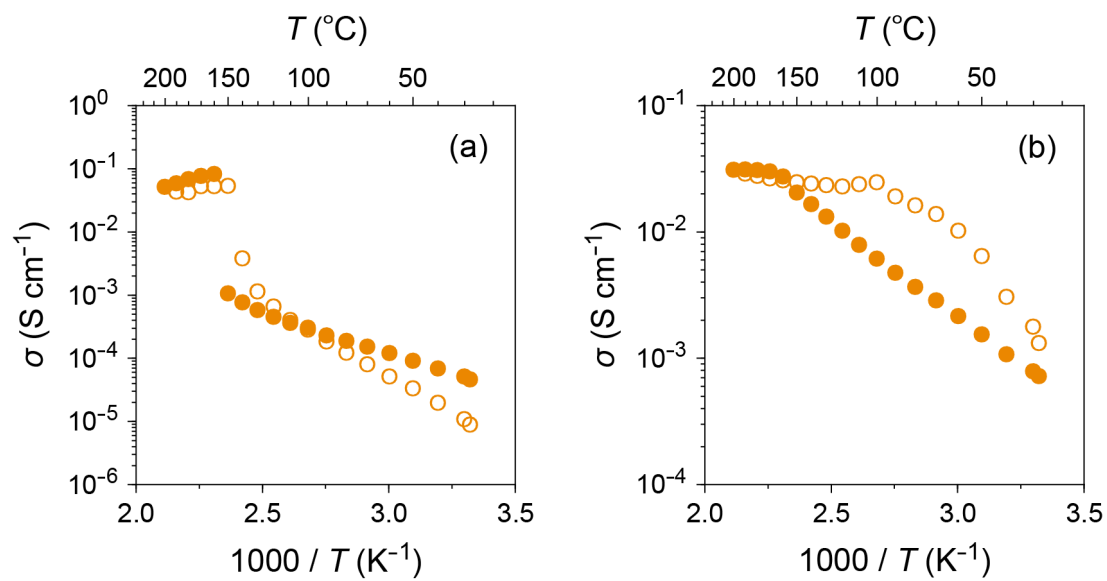

**Fig. S8** Temperature dependence of  $\sigma$  for AgI/MPA3 composite (a) before and (b) after heat treatment in heating (closed circles) and cooling (open circles) processes.

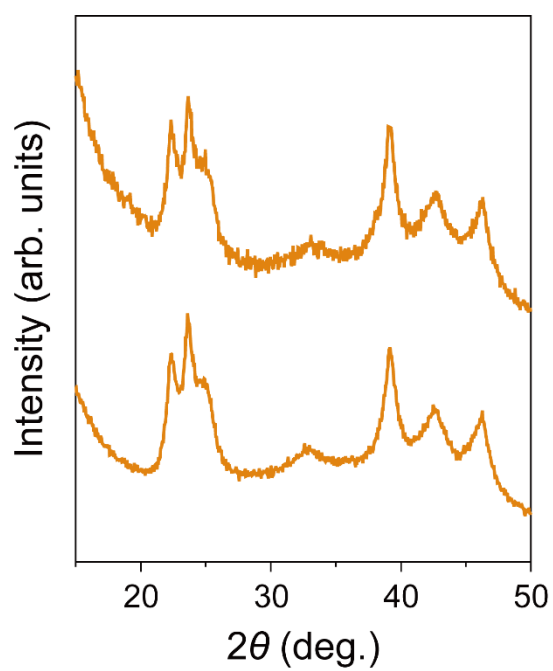

**Fig. S9** PXRd patterns of AgI/MPA3 composite before (bottom) and after (top) the electrochemical impedance spectroscopy measurements (25–200 °C).

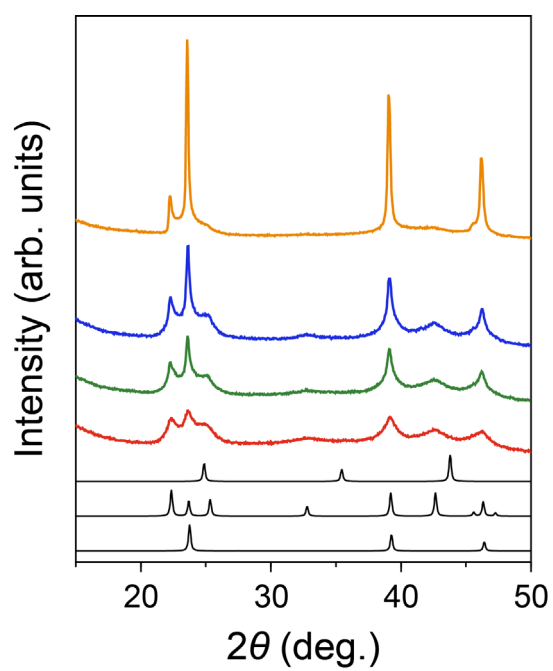

**Fig. S10** PXR D patterns of AgI/MPA3 composites (orange: before heat treatment, blue: heat treatment at 400 °C, green: heat treatment at 500 °C, red: heat treatment at 600 °C) along with simulated patterns (black thin lines) of  $\alpha$ -,  $\beta$ -, and  $\gamma$ -AgI (from the top).

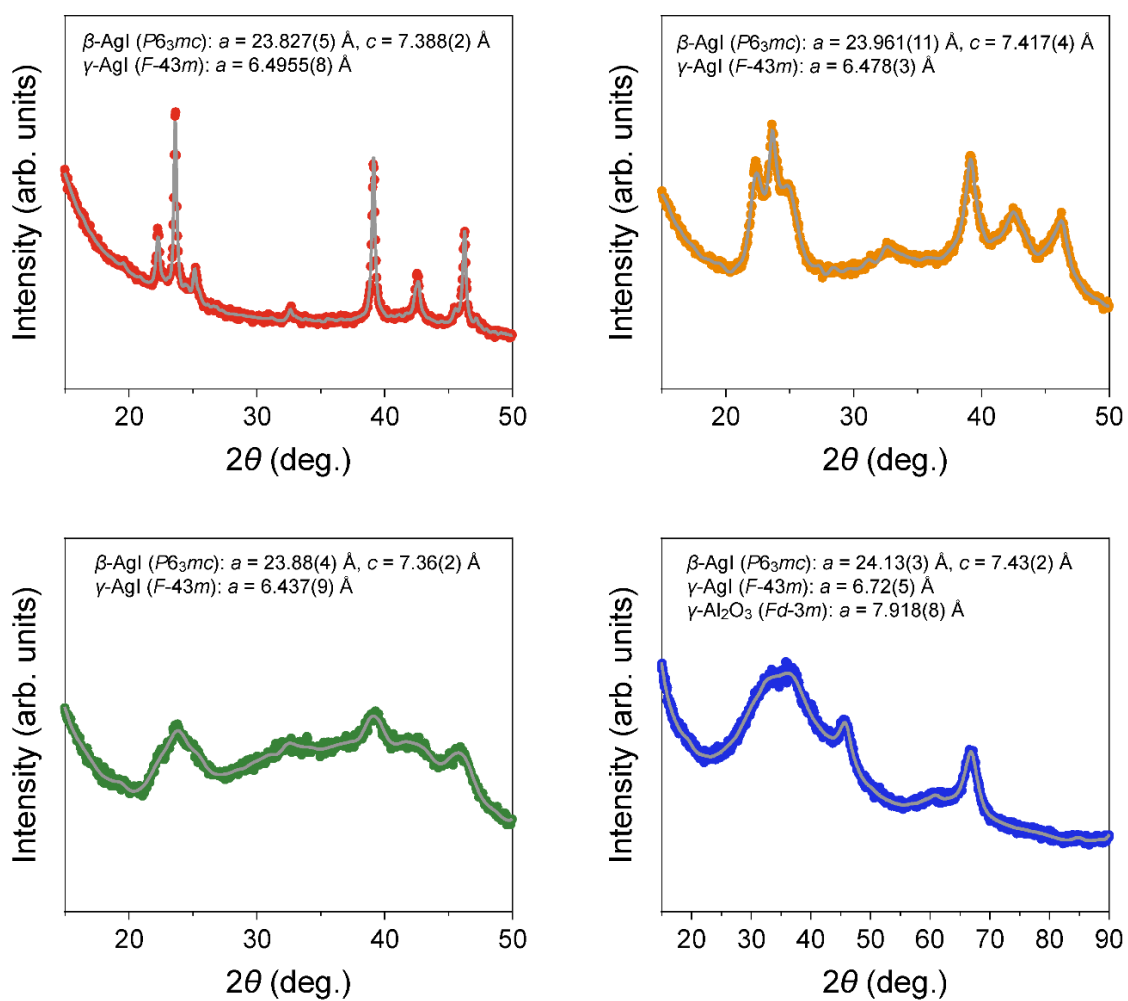

**Fig. S11** PXRD patterns of AgI/MPA3 composites (red: AgI/MPA3 = 8:2, orange: AgI/MPA3 = 6:4, green: AgI/MPA3 = 4:6, blue: AgI/MPA3 = 2:8) together with their corresponding patterns using the Le Bail method (solid gray line).

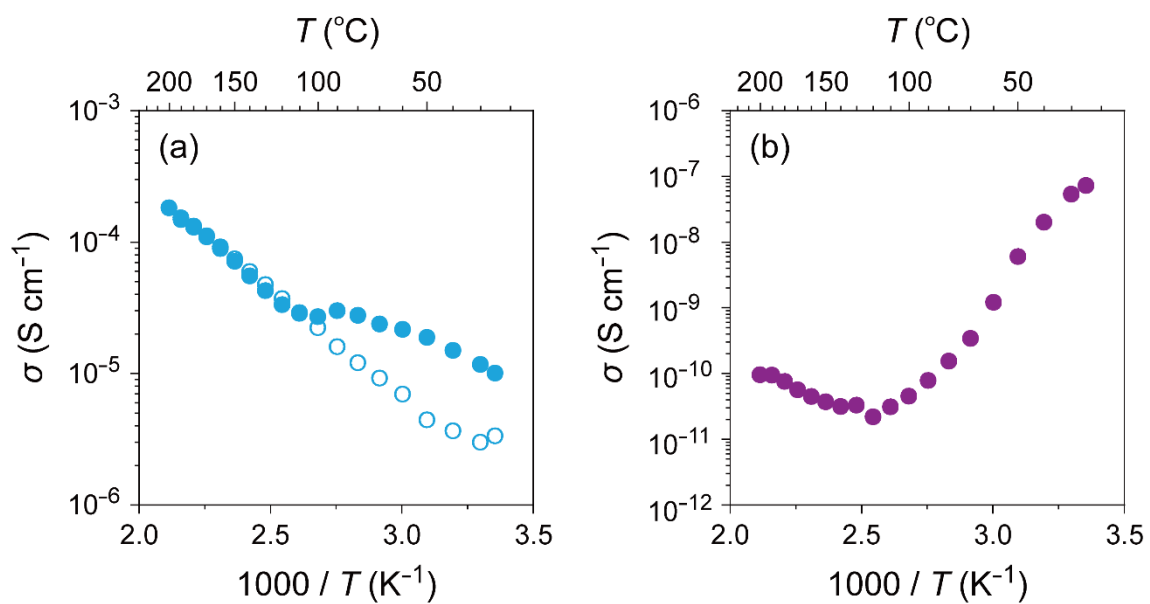

**Fig. S12** Temperature dependence of ionic conductivity ( $\sigma$ ) of composites with (a) AgI/MPA3 = 3:7 and (b) AgI/MPA3 = 1:9 in the heating (closed circles) and cooling (open circles) processes.

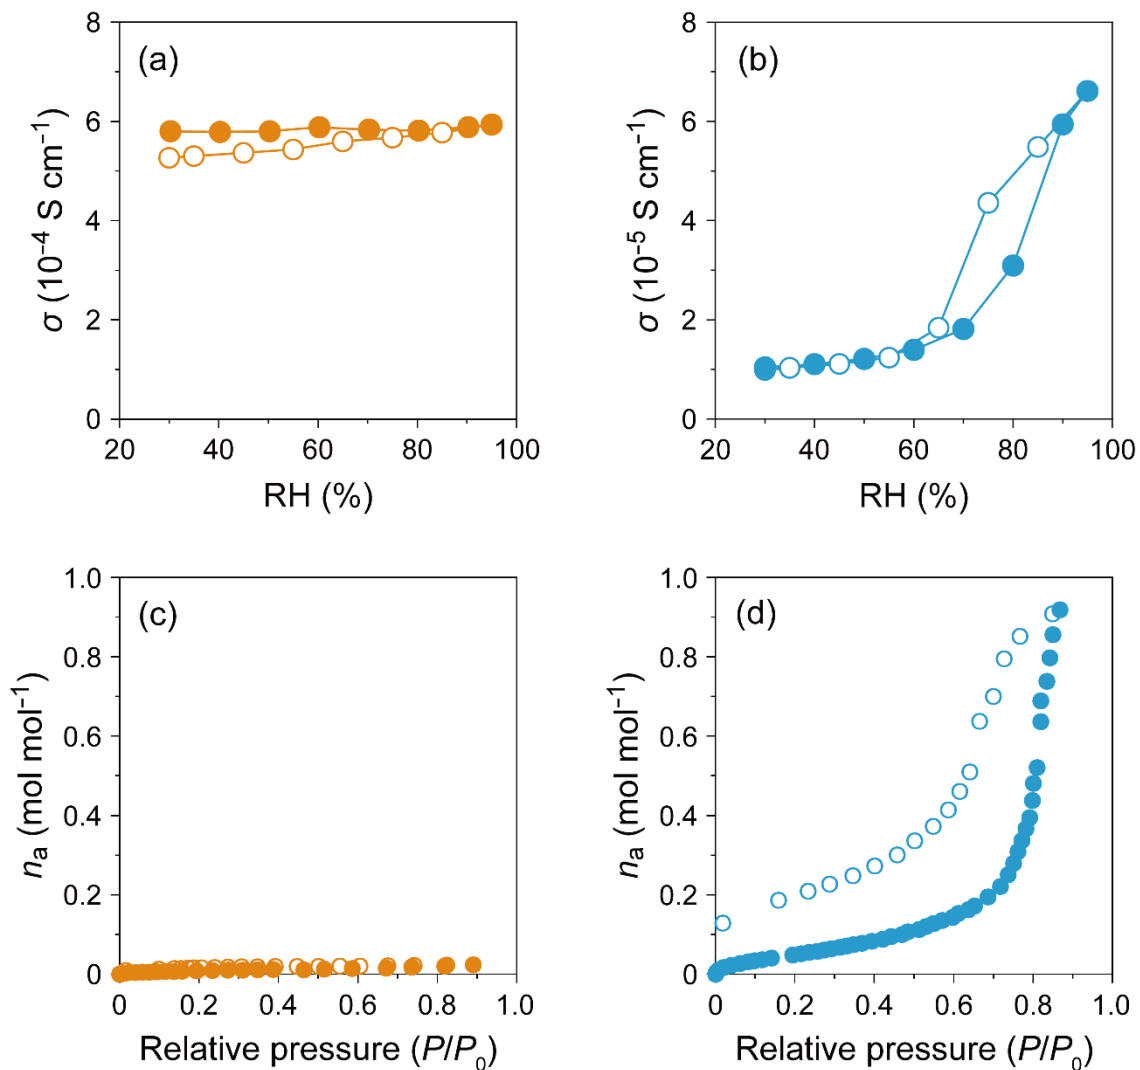

**Fig. S13** Humidity dependence of ionic conductivity ( $\sigma$ ) of composites with (a) AgI/MPA3 = 6:4 and (b) AgI/MPA3 = 3:7 at 25 °C. Water vapor adsorption (closed circles) and desorption (open circles) isotherms of composites with (c) AgI/MPA3 = 6:4 and (d) AgI/MPA3 = 3:7 at 25 °C.  $n_a$  is the molar number of water molecules adsorbed in a mole of MPA3 (formular unit:  $\text{Al}_2\text{O}_3$ ).
